# Supplementary material for: Enhancement of hydrogen production via methanol steam reforming using a Ni-based catalyst supported by spongy mesoporous alumina
Source: Royal Society of Chemistry journal article supplement (doi:10.1039/d4gc00397g), 2024-01-01
Supplement: d4gc00397g1.pdf [file d4gc00397g1.pdf]

## Supplementary Information

### Enhancement of Hydrogen Production via Methanol Steam Reforming Using Ni-based Catalyst Supported by Spongy Mesoporous Alumina

Bin Hu<sup>a</sup>, Riyang Shu<sup>a,\*</sup>, Zhipeng Tian<sup>a</sup>, Chao Wang<sup>a</sup>, Ying Chen<sup>a</sup>, Ying Xu<sup>b,\*</sup>

<sup>a</sup> *Guangdong Provincial Key Laboratory of Functional Soft Condensed Matter, School of Materials and Energy, Guangdong University of Technology, Guangzhou 510006, PR China*

<sup>b</sup> *College of Mechanical Equipment and Mechanical Engineering, Fujian Province Key Laboratory of Energy Clean Utilization and Development, Fujian Province Clean Combustion and Energy Utilization Research Center, Jimei University, Xiamen 316021, China*

\*Corresponding author

E-mail address: shuriyang@gdut.edu.cn, xuying@jmu.edu.cn

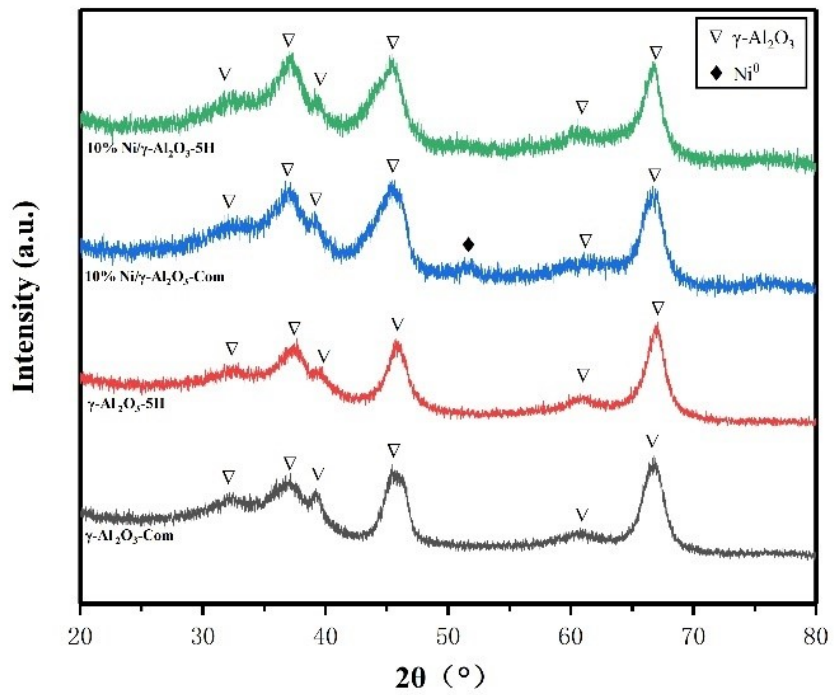

Fig. S1. XRD spectrum of the  $\gamma\text{-Al}_2\text{O}_3$  supports and Ni/ $\gamma\text{-Al}_2\text{O}_3$  catalysts.

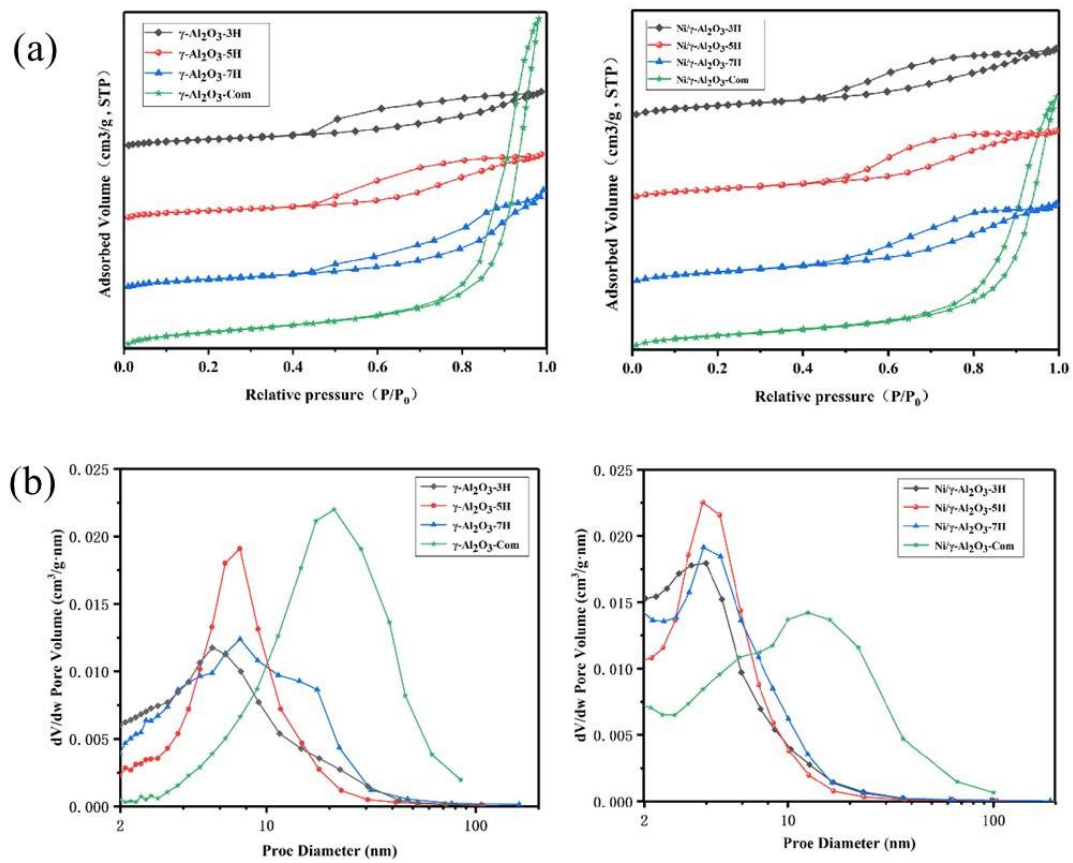

**Fig. S2.** The  $N_2$  adsorption-desorption isotherms and the corresponding pore size distributions of  $\gamma$ - $Al_2O_3$ -3H/5H/7H/Com supports and Ni/ $\gamma$ - $Al_2O_3$ -3H/5H/7H/Com catalysts.

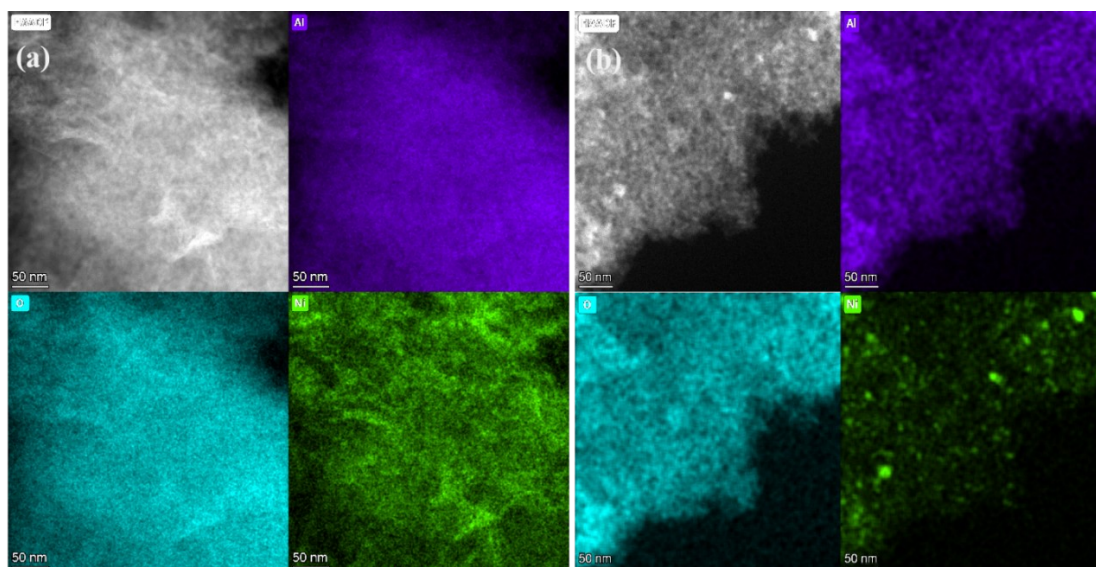

**Fig. S3.** TEM-EDS images of the (a,b) Ni/γ-Al<sub>2</sub>O<sub>3</sub>-5H and (c,d) Ni/γ-Al<sub>2</sub>O<sub>3</sub>-Com catalysts.

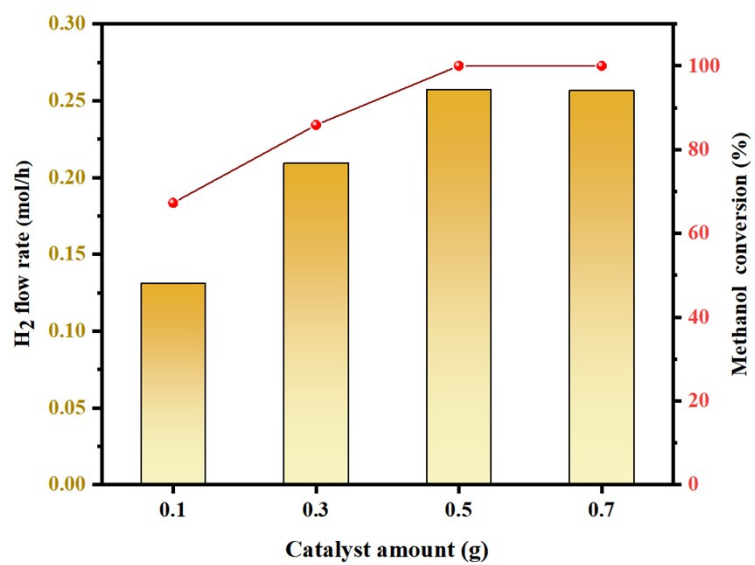

**Fig. S4.** The effect of catalyst amounts on the methanol steam reforming to hydrogen was examined at the temperature of 450 °C over Ni/ $\gamma$ -Al<sub>2</sub>O<sub>3</sub>-5H catalyst.



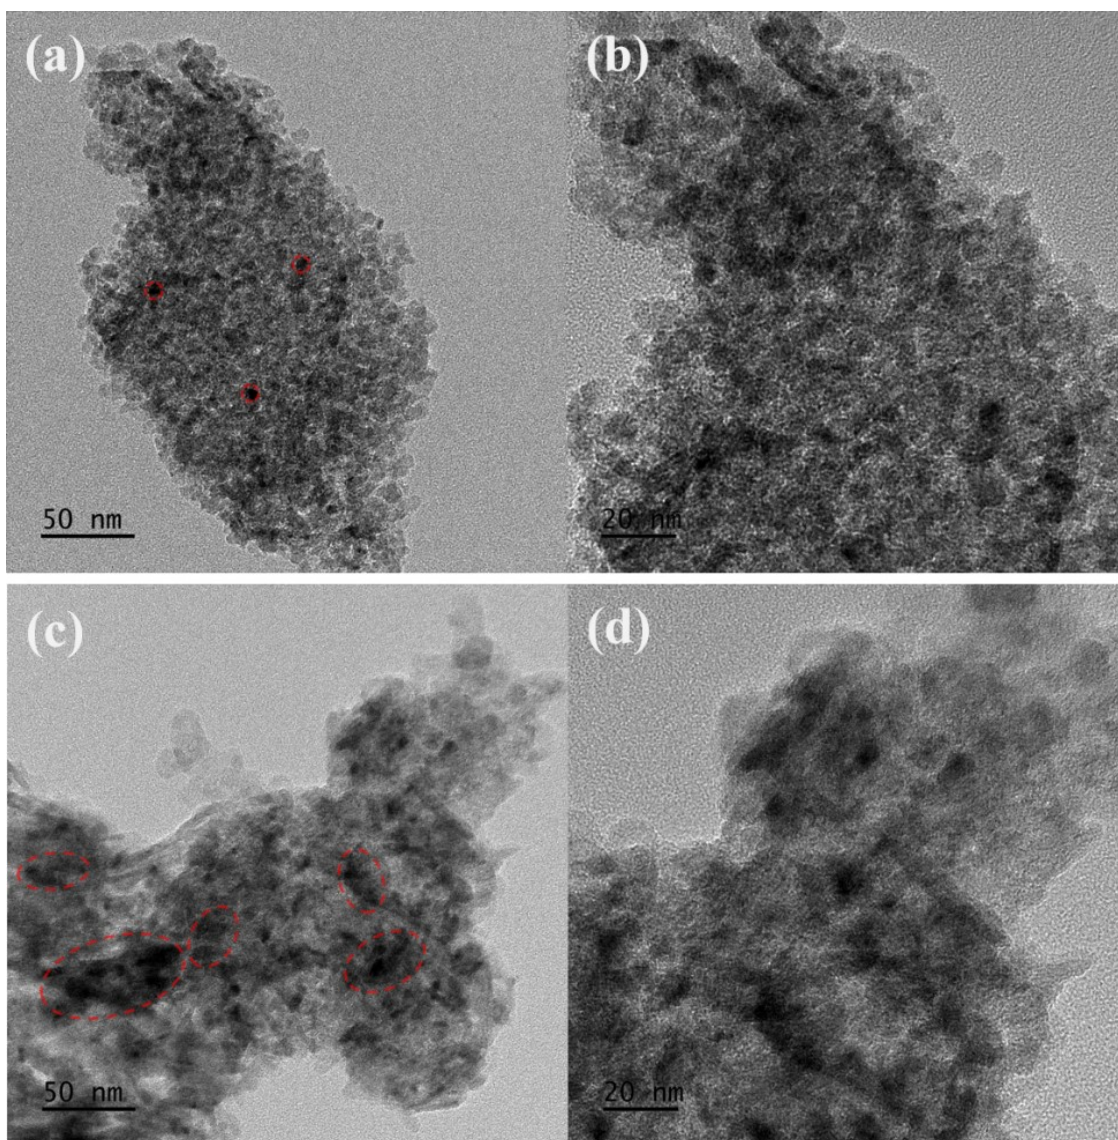

**Fig. S6.** TEM images of the (a,b) spent Ni/ $\gamma$ -Al<sub>2</sub>O<sub>3</sub>-5H and (c,d) spent Ni/ $\gamma$ -Al<sub>2</sub>O<sub>3</sub>-Com catalysts

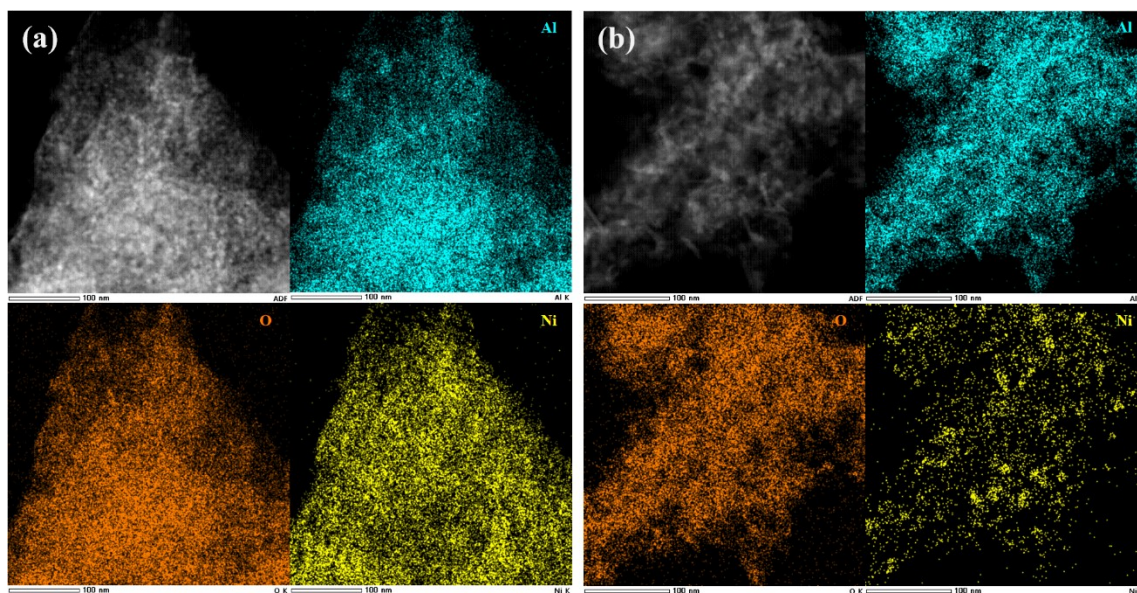

**Fig. S7.** TEM-EDS images of the (a,b) spent Ni/γ-Al<sub>2</sub>O<sub>3</sub>-5H and (c,d) spent Ni/γ-Al<sub>2</sub>O<sub>3</sub>-Com catalysts.



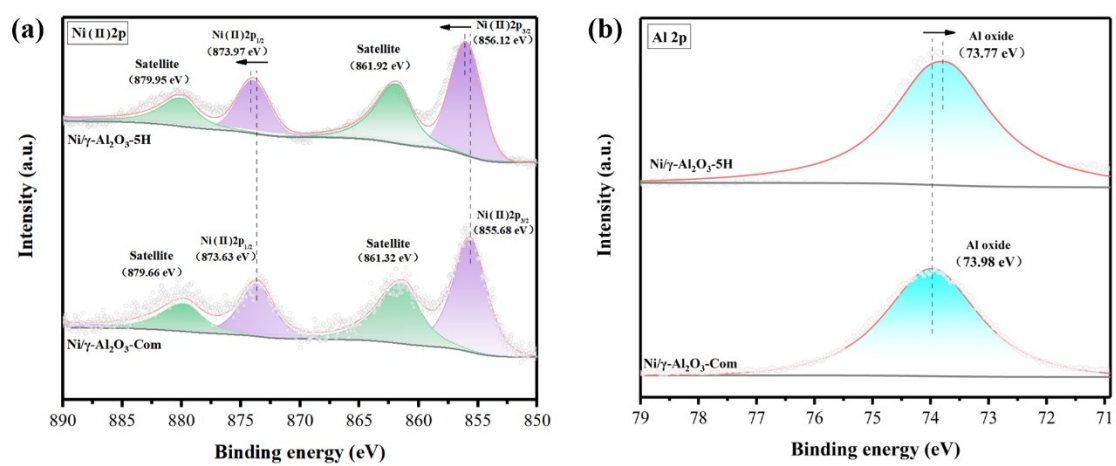

**Fig. S8.** XPS spectra (a) Ni 2p and (b) Al 2p of the spent Ni/γ-Al<sub>2</sub>O<sub>3</sub>-5H and spent Ni/γ-Al<sub>2</sub>O<sub>3</sub>-Com catalysts.
